# Supplementary material for: Comparative differential proteomic analysis of minimal change disease and focal segmental glomerulosclerosis
Source: Springer Nature journal article supplement (doi:10.1186/s12882-017-0452-6), 2017-02-03
Supplement: MOESM1 [file 12043578]

Supplemental Table 1. List of commercially available ELISA kits used to validate proteins identified by peptide mass fingerprinting.

| Protein Name                                              | Catalog Number              | Type | Dilution            | LDL (ng/ml) | Range (ng/ml) | Intra-Assay CV (%) | Inter-Assay CV (%) |
|-----------------------------------------------------------|-----------------------------|------|---------------------|-------------|---------------|--------------------|--------------------|
| Alpha-1 antitrypsin                                       | KA0459 <sup>a</sup>         | Q    | 1:5,000 - 1:40,000  | 0.3         | 0.39 - 100    | 4.9                | 7.0                |
| Transferrin                                               | KA0510 <sup>a</sup>         | Q    | 1:10,000 - 1:30,000 | 1.5         | 1.56 - 100    | 4.5                | 7.1                |
| Zinc-alpha-2-glycoprotein                                 | KA1689 <sup>a</sup>         | C    | 1 : 1               | 0.02        | 0.1 - 1000    | < 10               | < 15               |
| Calretinin                                                | E-EL-H0628 <sup>b</sup>     | Q    | 1 : 1               | 0.19        | 0.31 - 20     | < 10               | < 10               |
| Transmembrane channel-like protein 1                      | CSB-EL023633HU <sup>c</sup> | Q    | 1 : 1               | 0.006       | 0.03 - 1.6    | < 8                | < 10               |
| Histatin-3                                                | CSB-EL010879HU <sup>c</sup> | Q    | 1 : 1               | 39          | 156 - 10,000  | < 8                | < 10               |
| Nuclear inhibitor of protein phosphatase I                | CSB-EL018555HU <sup>c</sup> | Q    | 1 : 1               | 0.008       | 0.003 - 2     | < 8                | < 10               |
| Leucine-rich repeat-containing protein c10orf11           | CSB-EL002909HU <sup>c</sup> | Q    | 1 : 1               | 0.005       | 0.02 - 1.2    | < 8                | < 10               |
| Transcription elongation factor 1 homolog                 | CSB-EL007618HU <sup>c</sup> | Q    | 1 : 1               | 0.004       | 0.02 - 1      | < 8                | < 10               |
| PEST proteolytic signal-containing nuclear protein        | CSB-EL017625HU <sup>c</sup> | Q    | 1 : 1               | 0.006       | 0.02 - 1.5    | < 8                | < 10               |
| Branched-chain-amino-acid aminotransferase, mitochondrial | CSB-EL002601HU <sup>c</sup> | Q    | 1 : 1               | 0.006       | 0.02 - 1.5    | < 8                | < 10               |
| 39S ribosomal protein L17, mitochondrial                  | CSB-EL014824HU <sup>c</sup> | Q    | 1 : 1               | 0.006       | 0.03 - 1.6    | < 8                | < 10               |
| Platelet activating factor receptor                       | SEC753Hu <sup>d</sup>       | Q    | 1 : 1               | 0.06        | 0.16 - 10     | < 10               | < 12               |
| Cyclin Y                                                  | SED270Hu <sup>d</sup>       | Q    | 1 : 1               | 0.03        | 0.08 - 5      | < 10               | < 12               |
| Humanin-like protein 6                                    | E12591h <sup>e</sup>        | C    | 1 : 1               |             | 0.31 - 20     |                    |                    |

LDL is the sensitivity, the Lowest Detectable Limit, defined as the lowest protein concentration that could be differentiated from zero. Q means Quantitative

Sandwich ELISA and C means Competitive ELISA.

<sup>a</sup> Abnova (Heidelberg, Germany); <sup>b</sup> Elabscience (Wuhan, China); <sup>c</sup> Cusabio (Wuhan, China); <sup>d</sup> Cloud-Clone Corp. (Houston, TX, USA); <sup>e</sup> Wuhan EIABB Science (Wuhan, China)
